# Supplementary material for: Mini-pillar array for hydrogel-supported 3D culture and high-content histologic analysis of human tumor spheroids
Source: Royal Society of Chemistry journal article supplement (doi:10.1039/c6lc00526h), 2016-01-01
Supplement: c6lc00526h1.pdf [file c6lc00526h1.pdf]

**Supplementary Fig 1.** Pretreatment of mini-pillar array chip for culturing human TS.

Pre-coating of pillars was done by carefully applying 4  $\mu\text{L}$  of the respective pre-coating solution on the tip of each pillar followed by air-dry in a clean bench for 1 h. Cells were then loaded on the tips of mini-pillars in 1  $\mu\text{L}$  of cell-hydrogel suspension. A drop of aqueous pre-coating solution or cell suspension in hydrogels spread well on the surface of the tip without running off through the pillar. BaCl<sub>2</sub> crystals were be seen on the tip of pillars after pretreatment for alginate loading with PLL-BaCl<sub>2</sub> mixture (arrow).

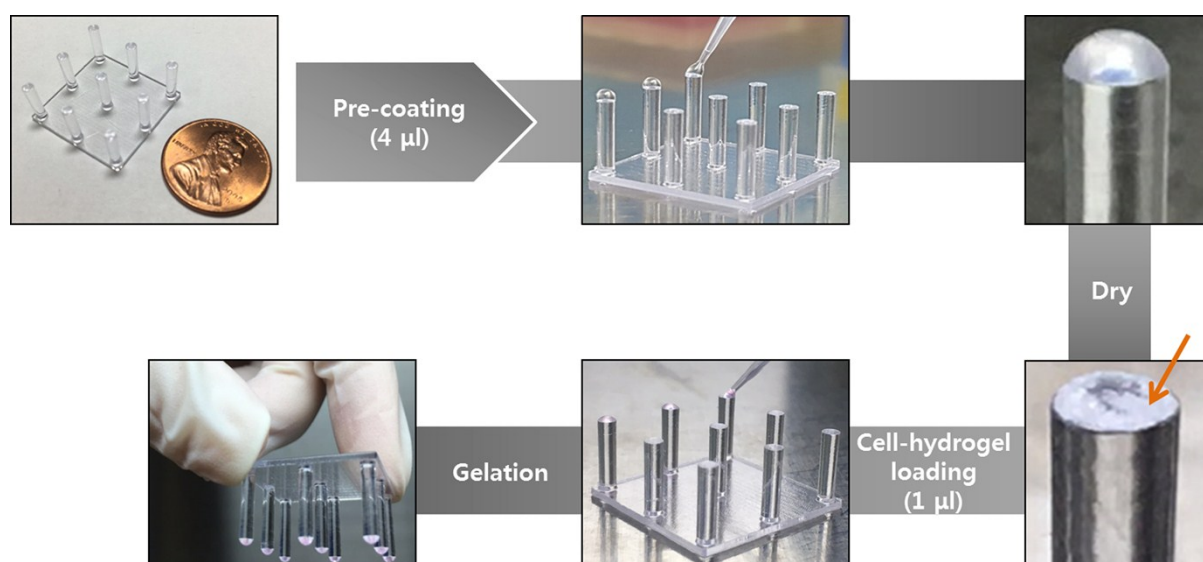

**Supplementary video 1a-b.** A video showing experimental steps of pillar pre-coating (a) and cell-loading (b) for culturing human tumor spheroids on a mini-pillar array chip. Feasibility of handling microvolumes for pre-coating and cell-loading can be demonstrated as the volumes were optimized for the diameter of pillar tips. Liquid-loading on to 9 pillars (1 chip) took only 40 sec. A drop of aqueous pre-coating solution or cell suspension in hydrogels spread well on the surface of the tip without running off through the pillar.
